# Supplementary material
Source: PubMed Central journal article supplement (PMC9116157)
Supplement: NIHMS1774860-supplement-Supplementary_Material.pdf [file NIHMS1774860-supplement-Supplementary_Material.pdf]

---

**Supplementary information**

---

**Valine tRNA levels and availability regulate complex I assembly in leukaemia**

---

In the format provided by the  
authors and unedited

## **Valine tRNA biogenesis and bioavailability regulates complex I assembly in leukemia**

Palaniraja Thandapani <sup>1\*</sup>, Andreas Kloetgen <sup>#1,4</sup>, Matthew T. Witkowski <sup>#1</sup>, Christina Glytsou <sup>#1</sup>,  
Anna K. Lee <sup>1</sup>, Eric Wang <sup>1</sup>, Jingjing Wang <sup>1</sup>, Sarah E. LeBoeuf <sup>1</sup>, Kleopatra Avrampou <sup>1</sup>, Thales  
Papagiannakopoulos<sup>1</sup>, Aristotelis Tsirigos<sup>1,2,3</sup>, and Iannis Aifantis<sup>1,\*</sup>

| <b>Table of contents</b>                              | <b>Page no</b> |
|-------------------------------------------------------|----------------|
| Supplemental Figure 1 (Uncropped gel images)          | 1              |
| Supplemental Figures 2-9 (FACS plots Gating strategy) | 4              |
| Supplemental Custom Codes                             | 7              |

**Figure 1e**

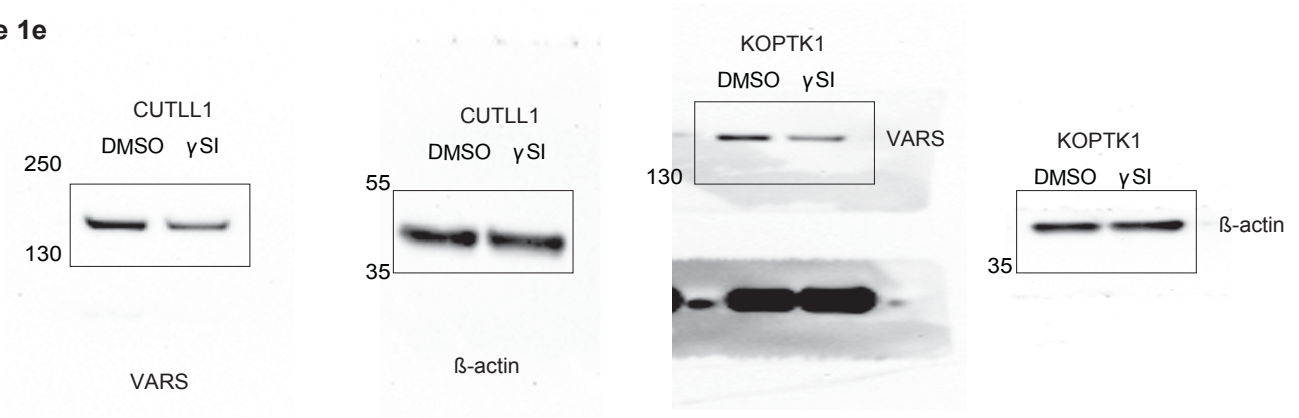

**Figure 5a**

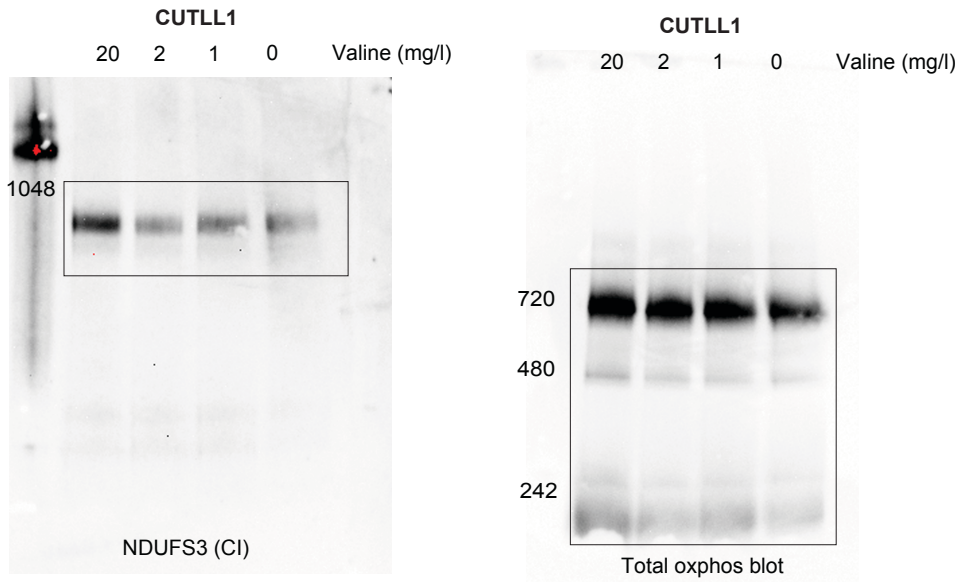

NDUF3 and total oxphos blot were from the same gel.

Extended Data 9a

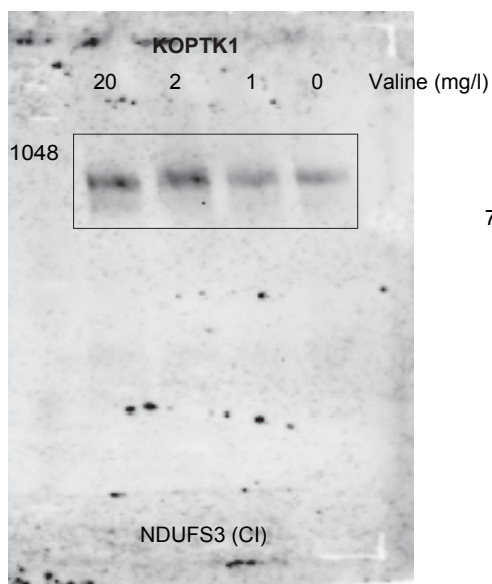

Extended Data 9a

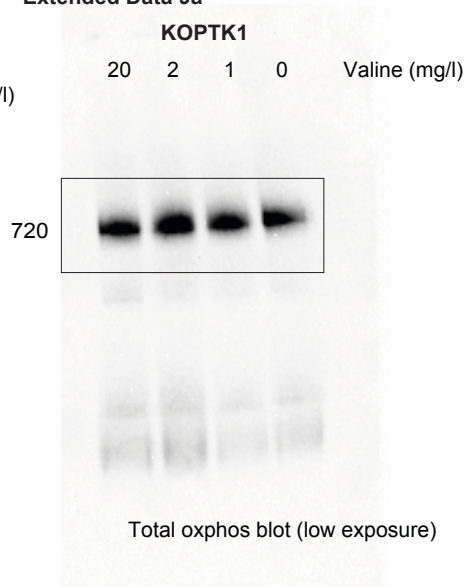

Extended Data 9a

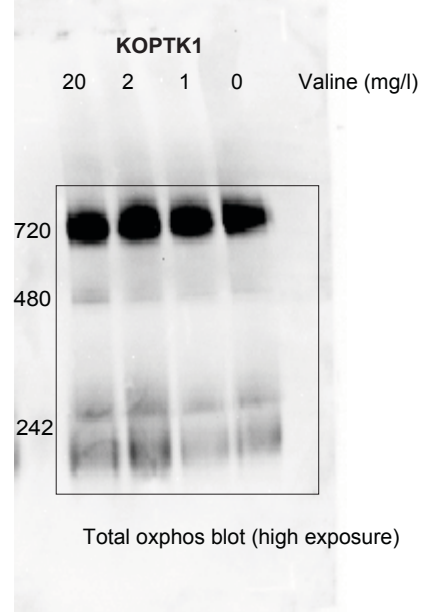

NDUFS3 and total oxphos blot were from the same gel.

Figure 5c and Extended Data 9g

CUTLL1\_Cas13d

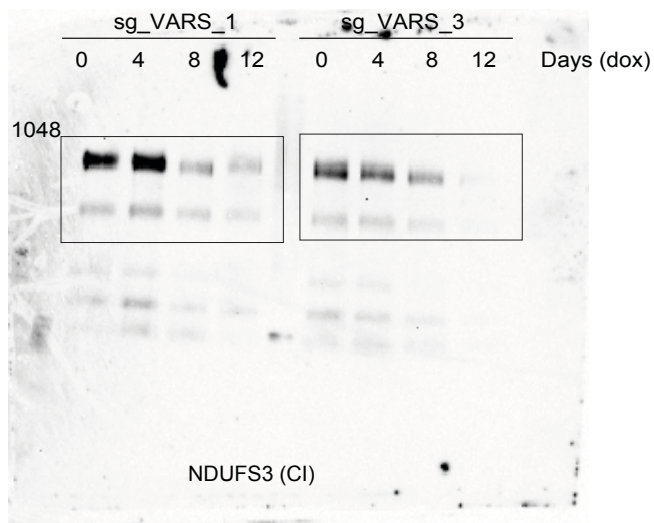

Figure 5c and Extended Data 9g

CUTLL1\_Cas13d

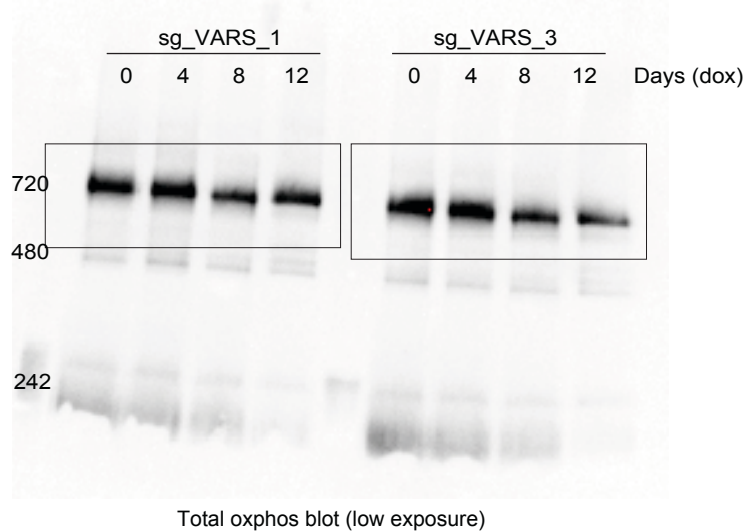



Figure 5c and Extended Data 9g

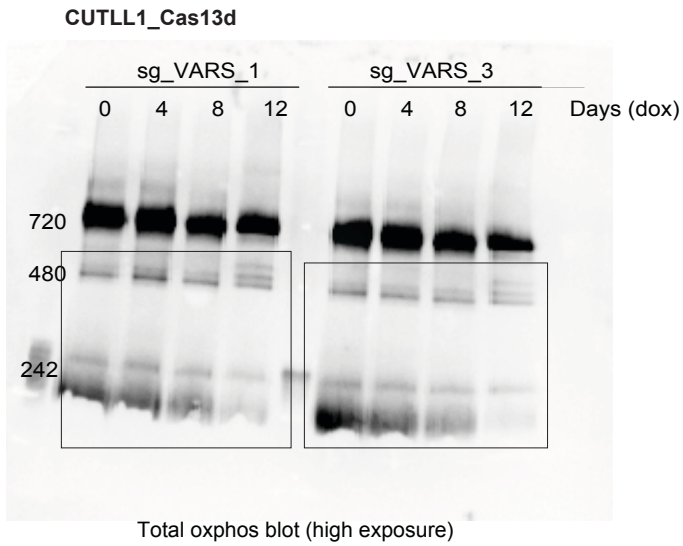

NDUFS3 and total oxphos blot were from the same gel.

Figure 5c and Extended Data 9g  
CUTLL1\_Cas13d

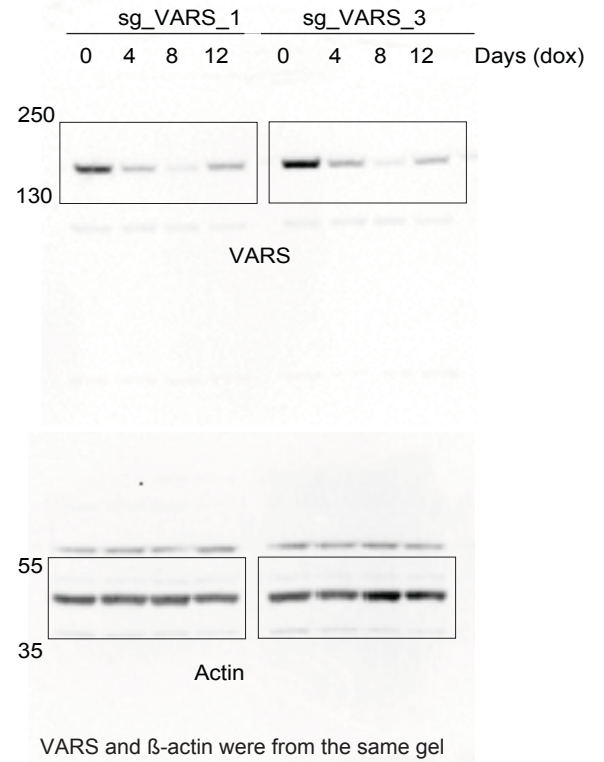

Extended Data 8f

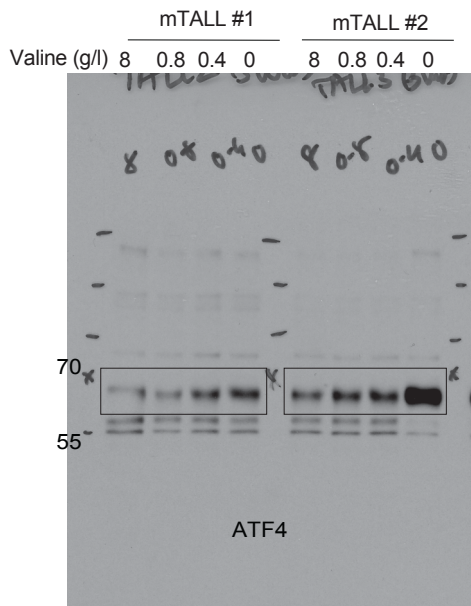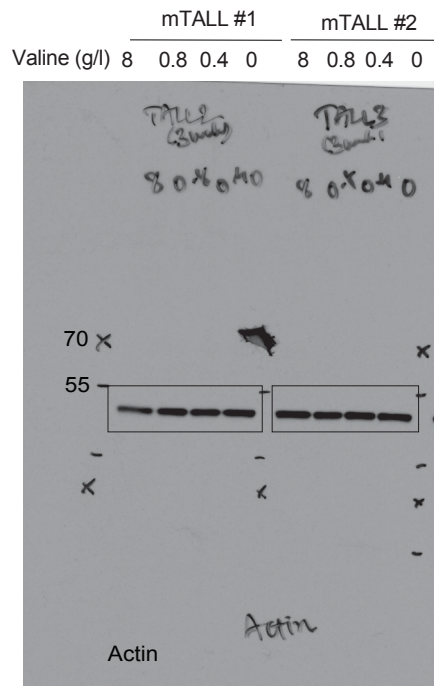

ATF4 and  $\beta$ -actin were from the same gel

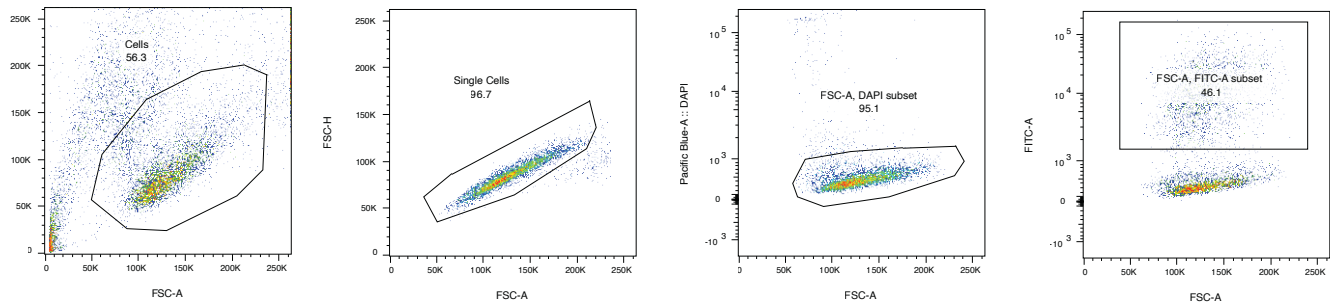

**Supplemental Figure 2.** Representative FACS gating strategy to determine percentage GFP+ cells over the time course of cellular fitness assays performed after knockout of candidate genes using CRISPR Cas9 or Cas13d system. Relevant to figures Extended Data 1b, 2f, 7c, 7d, 10b.

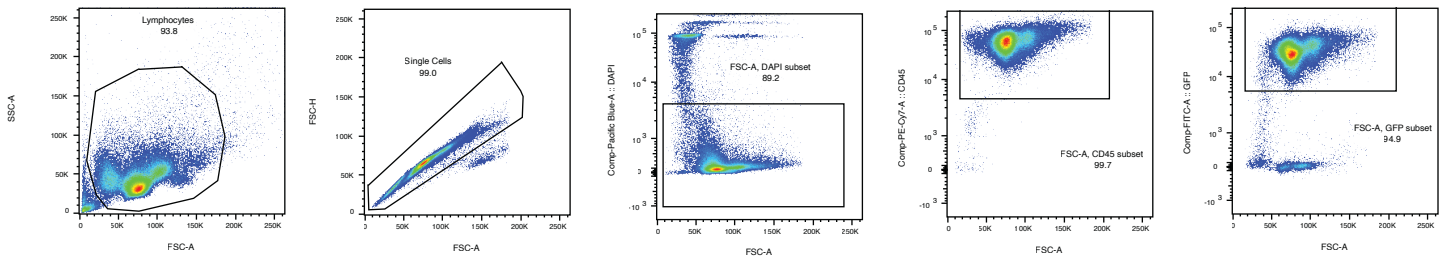

**Supplemental Figure 3.** Representative FACS gating strategy to determine percentage GFP+ cells *in vivo* from the peripheral bleeds of mice transplanted with primary NOTCH1-delta E-GFP tumors and fed different valine diets. Relevant to figures 2a, 2b, 2f, Extended Data 4c, 4e and 4h..

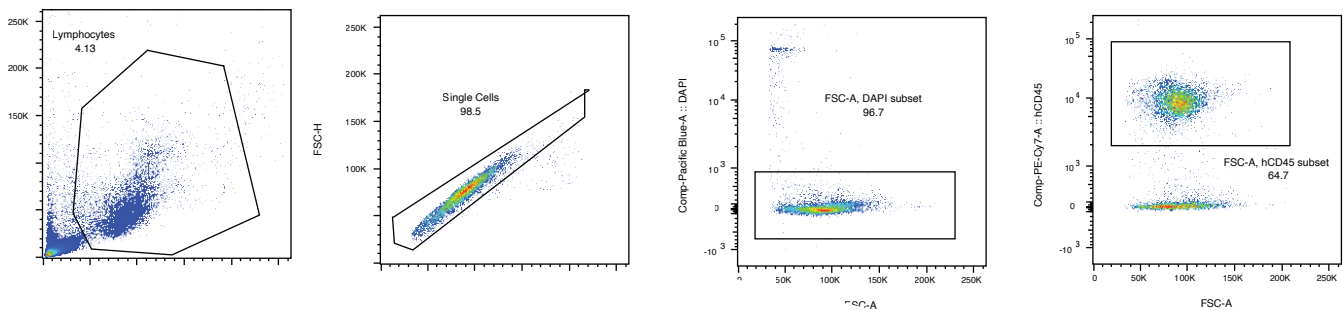

**Supplemental Figure 4.** Representative FACS gating strategy to determine percentage human CD45+ cells *in vivo* from the peripheral bleeds of mice transplanted with PDXs and fed different valine diets. Relevant to figures 2d.

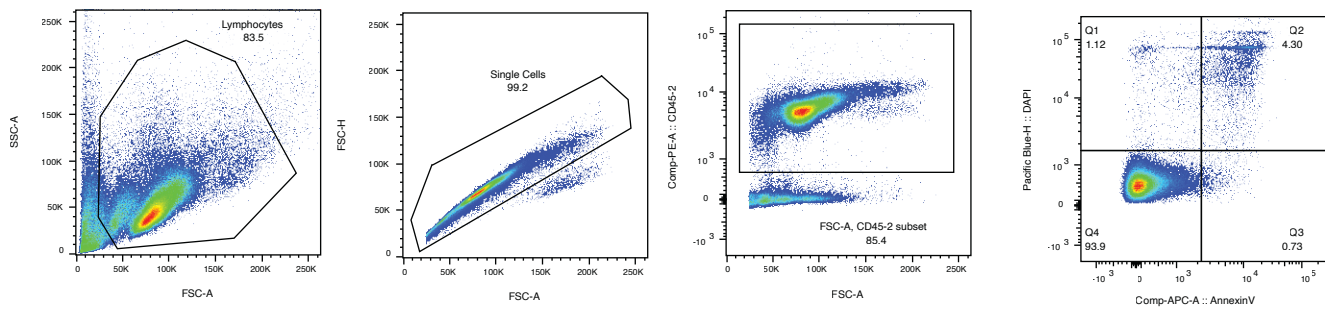

**Supplemental Figure 5.** Representative FACS gating strategy to determine percentage annexin V+ cells *in vivo* from the peripheral bleeds of mice transplanted with primary NOTCH1-delta E-GFP tumors and fed different valine diets. Relevant to figure Extended Data 4. Data 1b, 2f, 7c, 7d, 10b.

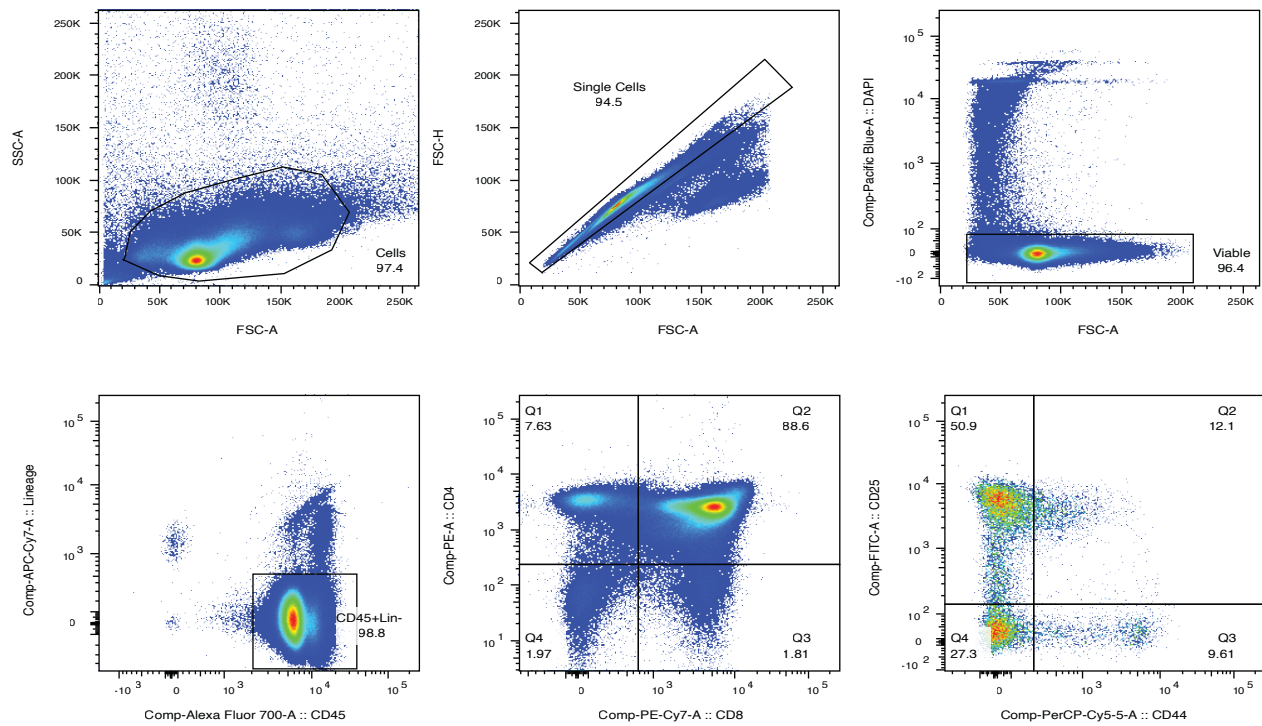

**Supplemental Figure 6.** Representative FACS gating strategy to determine percentage thymocyte subsets from thymus of mice fed different levels of valine. Relevant to figure Extended Data 6..

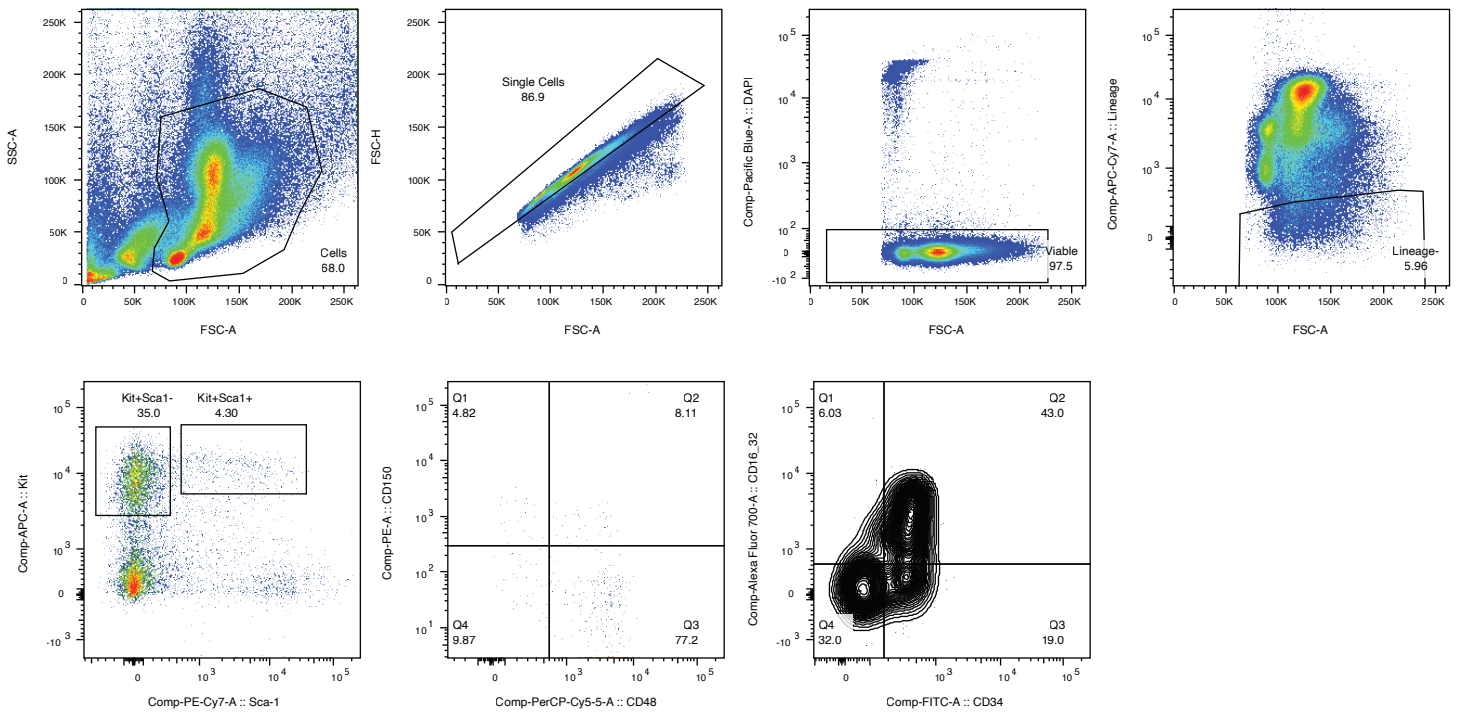

**Supplemental Figure 7.** Representative FACS gating strategy to determine percentage progenitors from mice fed different levels of valine. Relevant to figure Extended Data 6a..

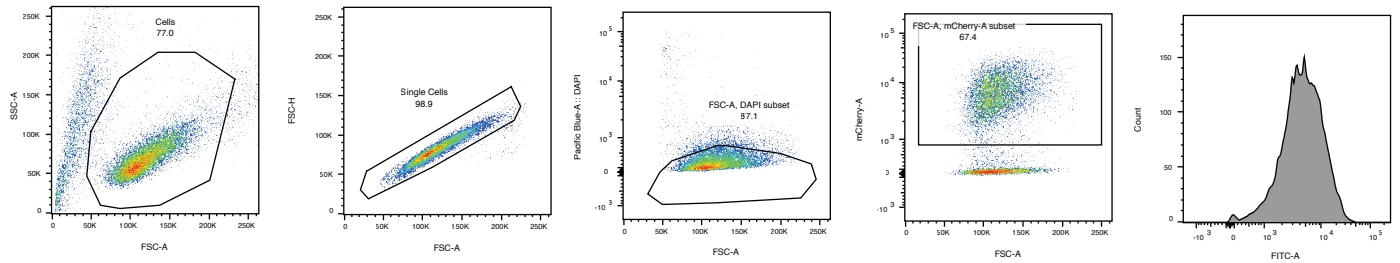

**Supplemental Figure 8.** Representative FACS gating strategy to determine GFP\_d2 and mCherry mean fluorescence intensity for the reporter assays. Relevant to figure Extended Data 8j.

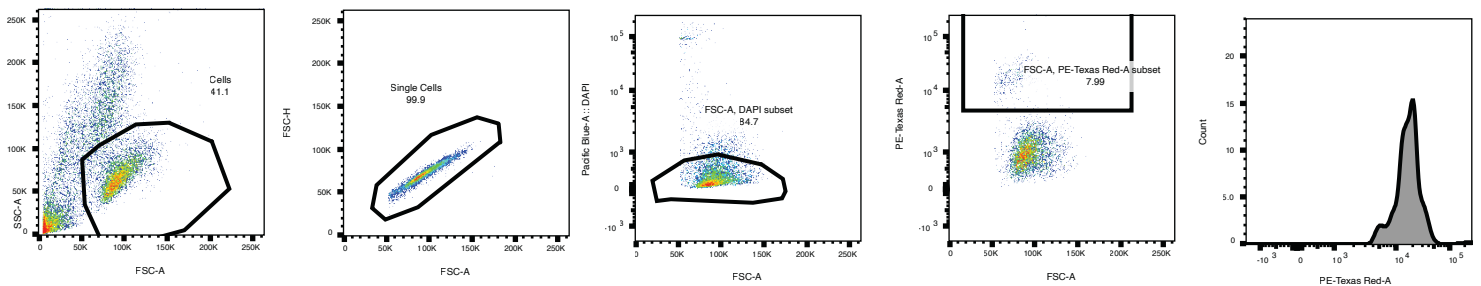

**Supplemental Figure 9.** Representative FACS gating strategy to determine mean fluorescence intensity of MitoSox Deep Red staining assays. Relevant to figure Extended Data 9i.

## count\_gRNAs\_in\_CRISPR.pl

```
my $fastq = $ARGV[0];
my $guides = $ARGV[1];
my $out = $ARGV[2];

my %guides;
open(GUIDES, "<$guides");
while (my $line = <GUIDES>) {
    chomp($line);
    $line =~ s/\r//g;

    my @splitted_line = split(/\t/, $line);
    $splitted_line[3] = 0;
    $guides{uc($splitted_line[2])} = \@splitted_line;
}
close(GUIDES);

print "guides loaded\n";
my $rows = 0;

my $header_line = 0;
my $total_counts = 0;
my $header_line_count = 0;
open(FASTQ, "<$fastq");
while (my $line = <FASTQ>) {
    chomp($line);
    if ($header_line_count % 4 == 0) {
        $header_line = 1;
        $rows++;
    } elsif ($header_line) {
        my $sequence = substr($line, 0, 20);
        if (defined($guides{uc($sequence)})) {
            $guides{uc($sequence)}[3]++;
            $total_counts++;
        }

        $header_line = 0;
    }
    $header_line_count++;
}
close(FASTQ);

my @sorted_keys = sort {$guides{$a}[0] cmp $guides{$b}[0]} keys(%guides);

open(OUT, ">$out");
print OUT "gRNA_ID\tsymbol\tsequence\tgRNA counts\n";
foreach my $guide_seq (@sorted_keys) {
    print OUT join("\t", @{$guides{$guide_seq}}) . "\n";
}
close(OUT);
```

## count\_tRNA\_anticodons.pl

```
my $fastq = $ARGV[0];
my $trnas = $ARGV[1];
my $out = $ARGV[2];

my %trnas;
my %trnas_counts;

open(TRNAS, "<$trnas");
while (my $line = <TRNAS>) {
    chomp($line);
    my @splitted_line = split(/\t/, $line);
    $trnas{$splitted_line[0]} = $splitted_line[1];
}
close(TRNAS);

my $header_line=0;
my $counts = 0;
my $header_line_count = 0;

open(FASTQ, "<$fastq");
while (my $line = <FASTQ>) {
    chomp($line);
    if ($header_line_count % 4 == 0) {
        $header_line = 1;
        $counts++;
    } elsif ($header_line) {
        foreach my $key (keys(%trnas)) {
            if ($line =~ /$trnas{$key}/) {
                if (defined($trnas_counts{$key})) {
                    $trnas_counts{$key}++;
                } else {
                    $trnas_counts{$key} = 1;
                }
            }
        }
    }
    $header_line = 0;
    $header_line_count++;
}
close(FASTQ);

open(OUT, ">$out");
foreach my $key (keys(%trnas_counts)) {
    print OUT $key . "\t" . $trnas_counts{$key} . "\n";
}
close(OUT);
```

## combine\_anticodons\_per\_aminoacid.pl

```
my $tRNAs = $ARGV[0];
my $out = $ARGV[-1];

my $ARGC = @ARGV;
my %tRNAs;

open(TRNAS, "<$tRNAs");
while (my $line = <TRNAS>) {
    chomp($line);
    my @splitted_line = split(/\t/, $line);
    my @splitted_id = split(/[-_]/, $splitted_line[0]);

    $tRNAs{$splitted_id[0] . "_" . $splitted_id[1]} = 0;
}
close(TRNAS);

for (my $i = 1; $i < $ARGC-1; $i++) {
    my $filename = $ARGV[$i];

    open(FILE, "<$filename");
    while (my $line = <FILE>) {
        chomp($line);
        my @splitted_line = split(/\t/, $line);
        my @splitted_id = split(/[-_]/, $splitted_line[0]);
        $tRNAs{$splitted_id[0] . "_" . $splitted_id[1]} += $splitted_line[1];
    }
    close(FILE);
}

my @sorted_keys = sort {$a cmp $b} keys(%tRNAs);

open(OUT, ">$out");
foreach my $key (@sorted_keys) {
    print OUT $key . "\t" . $tRNAs{$key} . "\n";
}
close(OUT);
```
